# Supplementary material for: Data supporting the role of Fyn in initiating myelination in the peripheral nervous system
Source: PubMed Central journal article supplement (PMC4833127; doi:10.1016/j.dib.2016.03.096), 2016-04-01
Supplement: mmc1.pdf [file mmc1.pdf]

**\*Conflict of Interest Form**

**[Click here to download Conflict of Interest Form: coi\\_disclosure11.pdf](#)**

**\*Conflict of Interest Form**

**[Click here to download Conflict of Interest Form: coi\\_disclosure12.pdf](#)**

**\*Conflict of Interest Form**

**[Click here to download Conflict of Interest Form: coi\\_disclosure13.pdf](#)**

**\*Conflict of Interest Form**

**[Click here to download Conflict of Interest Form: coi\\_disclosure14.pdf](#)**

**\*Conflict of Interest Form**

**[Click here to download Conflict of Interest Form: coi\\_disclosure15.pdf](#)**

**\*Conflict of Interest Form**

**[Click here to download Conflict of Interest Form: coi\\_disclosure16.pdf](#)**

**\*Conflict of Interest Form**

**[Click here to download Conflict of Interest Form: coi\\_disclosure17.pdf](#)**

**\*Conflict of Interest Form**

**[Click here to download Conflict of Interest Form: coi\\_disclosure18.pdf](#)**
